# Supplementary material
Source: Springer Nature journal article supplement (https://www.springermedizin.de/resource/supplementary/12967_2013_1901_MOESM3_ESM.pdf/9575078)

GI Patients <sup>51</sup>Cr Release Assay  
COLO356/FG

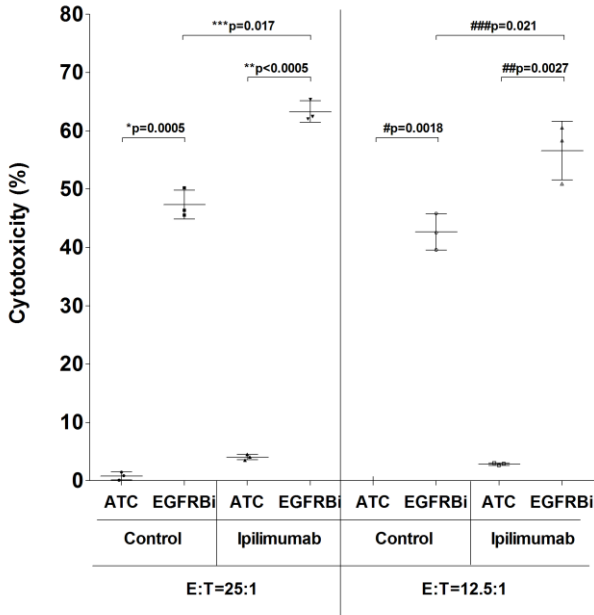

GI Patients <sup>51</sup>Cr Release Assay (COLO356/FG)  
Normalized Percent Increase

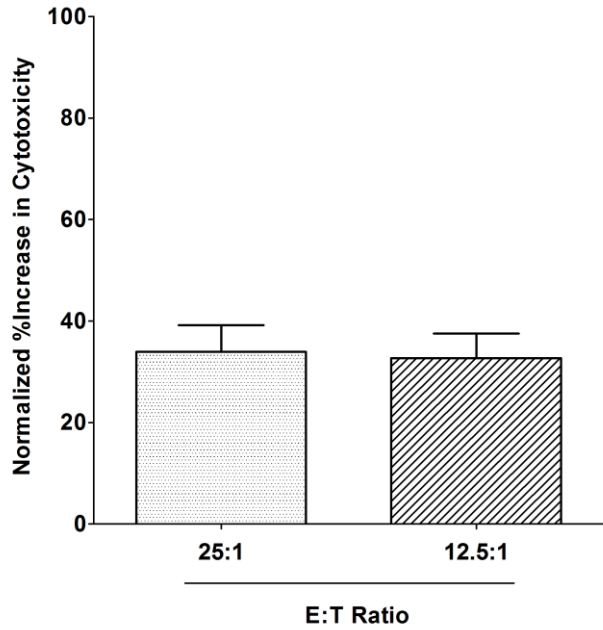

Healthy Donors ATC Expansion  
With or Without Ipilimumab

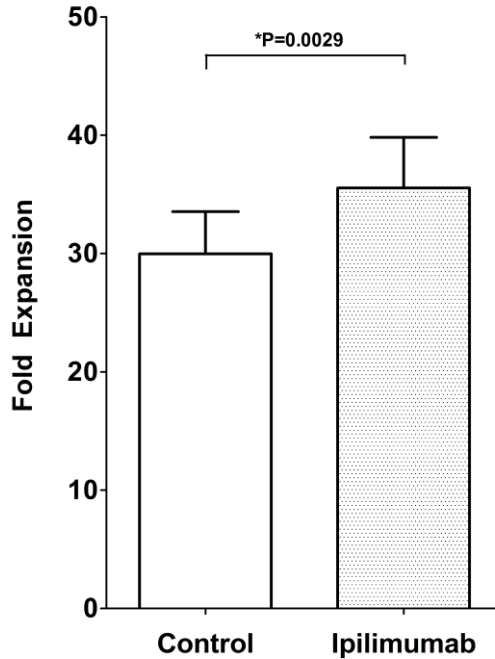

Supplement: MOESM3 [file 9575078]
